# Supplementary material for: Interspecific Aggressions between Crested Porcupines and Roe Deer
Source: MDPI journal article supplement (doi:10.3390/ani10040623), 2020-04-04
Supplement: s1 [file s1]

## Supplementary File

Table S1. Aggressive interactions between crested porcupine and roe deer in open areas.

| ID | Date       | Location                    | Season | Hour     | Habitat Type | N° Porcupines | N° Roe Deer | Age & Sex of Roe Deer | Roe Deer exposure                  |
|----|------------|-----------------------------|--------|----------|--------------|---------------|-------------|-----------------------|------------------------------------|
| 1  | 20/06/2015 | Prata (GR)                  | Summer | 19:49:00 | Open area    | 1             | 1           | Juvenile male         | Chased                             |
| 2  | 28/08/2015 | Orgia (SI)                  | Summer | 21:35:00 | Ecotone      | 2             | 2           | Female and juvenile   | Chased                             |
| 3  | 30/08/2015 | Pratovecchio (AR)           | Summer | 20:40:00 | Ecotone      | 3             | 1           | Adult female          | Chased                             |
| 4  | 17/05/2016 | Arezzo (AR)                 | Spring | 20:35:00 | Open area    | 1             | 1           | Juvenile male         | Bitten                             |
| 5  | 22/06/2016 | Pratovecchio (AR)           | Summer | 20:39:00 | Open area    | 3             | 1           | Juvenile female       | Injured with quills                |
| 6  | 03/08/2016 | Passo della Consuma (AR)    | Summer | 20:23:00 | Open area    | 1             | 1           | Juvenile female       | Chased                             |
| 7  | 11/08/2016 | Pitigliano (GR)             | Summer | 20:33:00 | Ecotone      | 2             | 1           | Adult female          | Chased                             |
| 8  | 11/08/2016 | Sarzana (SP)                | Summer | -        | -            | -             | -           | Juvenile male         | Injured with quills and found dead |
| 9  | 06/09/2016 | Braccagni (GR)              | Summer | 19:50:00 | Ecotone      | 2             | 1           | Juvenile male         | Chased                             |
| 10 | 27/10/2016 | Castell' Azzara (GR)        | Autumn | 21:42:00 | Ecotone      | 2             | 2           | Adult males           | Chased                             |
| 11 | 15/04/2017 | Orgia (SI)                  | Spring | -        | -            | -             | -           | Juvenile male         | Injured with quills and found dead |
| 12 | 20/05/2017 | Arezzo (AR)                 | Spring | 20:37:00 | Open area    | 2             | 1           | Adult female          | Chased                             |
| 13 | 26/05/2017 | Colombaio Quercegrossa (SI) | Spring | 21:48:00 | Open area    | 2             | 2           | Adult females         | Chased                             |
| 14 | 05/06/2017 | Sarzana (SP)                | Summer | 21:10:00 | Open area    | 2             | 1           | Juvenile female       | Injured with quills                |
| 15 | 18/06/2017 | Quarata (AR)                | Summer | 20:51:00 | Ecotone      | 3             | 1           | Juvenile female       | Chased                             |
| 16 | 08/07/2017 | Scarlino Scalo (GR)         | Summer | 21:25:00 | Open area    | 1             | 1           | Juvenile female       | Injured with quills                |
| 17 | 10/07/2017 | Forcoli - Montieri (GR)     | Summer | 20:01:00 | Open area    | 2             | 1           | Juvenile female       | Chased                             |
| 18 | 09/09/2017 | Quarata (AR)                | Summer | 20:54:00 | Ecotone      | 1             | 1           | Juvenile female       | Bitten                             |
| 19 | 19/09/2017 | Boccheggiano (GR)           | Summer | -        | -            | -             | -           | Juvenile female       | Injured with quills and found dead |
| 20 | 15/11/2017 | Passo della Consuma (AR)    | Autumn | 20:27:00 | Ecotone      | 1             | 1           | Adult female          | Injured with quills                |
| 21 | 04/05/2018 | Monteroni d'Arbia (SI)      | Spring | 20:19:00 | Ecotone      | 1             | 1           | Juvenile female       | Bitten                             |
| 22 | 18/05/2018 | Follonica (GR)              | Spring | 19:57:00 | Open area    | 1             | 1           | Juvenile female       | Injured with quills                |
| 23 | 28/05/2018 | Forcoli - Montieri (GR)     | Spring | 20:05:00 | Open area    | 3             | 1           | Juvenile male         | Injured with quills                |
| 24 | 28/05/2018 | Mele (GE)                   | Spring | 06:25:00 | -            | -             | -           | Juvenile female       | Injured with quills and found dead |
| 25 | 22/11/2018 | Asciano (SI)                | Autumn | 19:47:00 | Ecotone      | 2             | 1           | Adult female          | Chased                             |
| 26 | 11/05/2019 | Orgia (SI)                  | Spring | 21:29:00 | Open area    | 1             | 2           | Adult females         | Chased                             |

|    |            |                          |        |          |           |   |   |               |                                       |
|----|------------|--------------------------|--------|----------|-----------|---|---|---------------|---------------------------------------|
| 27 | 01/06/2019 | Passo della Consuma (AR) | Spring | -        | -         | - | - | Juvenile male | Injured with quills and<br>found dead |
| 28 | 14/06/2019 | Quarata (AR)             | Spring | 20:58:00 | Open area | 1 | 1 | Adult male    | Chased                                |
| 29 | 07/07/2019 | Pratovecchio (AR)        | Summer | 20:43:00 | Ecotone   | 1 | 1 | Adult female  | Chased                                |
| 30 | 15/09/2019 | Forcoli - Montieri (GR)  | Summer | 20:07:00 | Open area | 2 | 1 | Adult female  | Chased                                |
| 31 | 18/09/2019 | Pratovecchio (AR)        | Summer | 20:48:00 | Open area | 1 | 1 | Young female  | Injured with quills                   |
| 32 | 27/09/2019 | Forcoli - Montieri (GR)  | Autumn | 20:09:00 | Ecotone   | 2 | 1 | Young female  | Injured with quills                   |
| 33 | 11/10/2019 | Forcoli - Montieri (GR)  | Autumn | 20:14:00 | Open area | 2 | 1 | Adult female  | Chased                                |
| 34 | 18/10/2019 | Buonconvento (SI)        | Autumn | 19:53:00 | Ecotone   | 3 | 1 | Young male    | Injured with quills                   |
